# Supplementary material
Source: PubMed Central journal article supplement (PMC4094113)
Supplement: NIHMS595615-supplement-supplement_1.pdf [file NIHMS595615-supplement-supplement_1.pdf]

**Supplementary Fig. 1** Trends in monthly prevalence of overall antipsychotic, FGA, SGA, risperidone and olanzapine use in patients with dementia according to criteria used to define dementia (3-month moving average series)

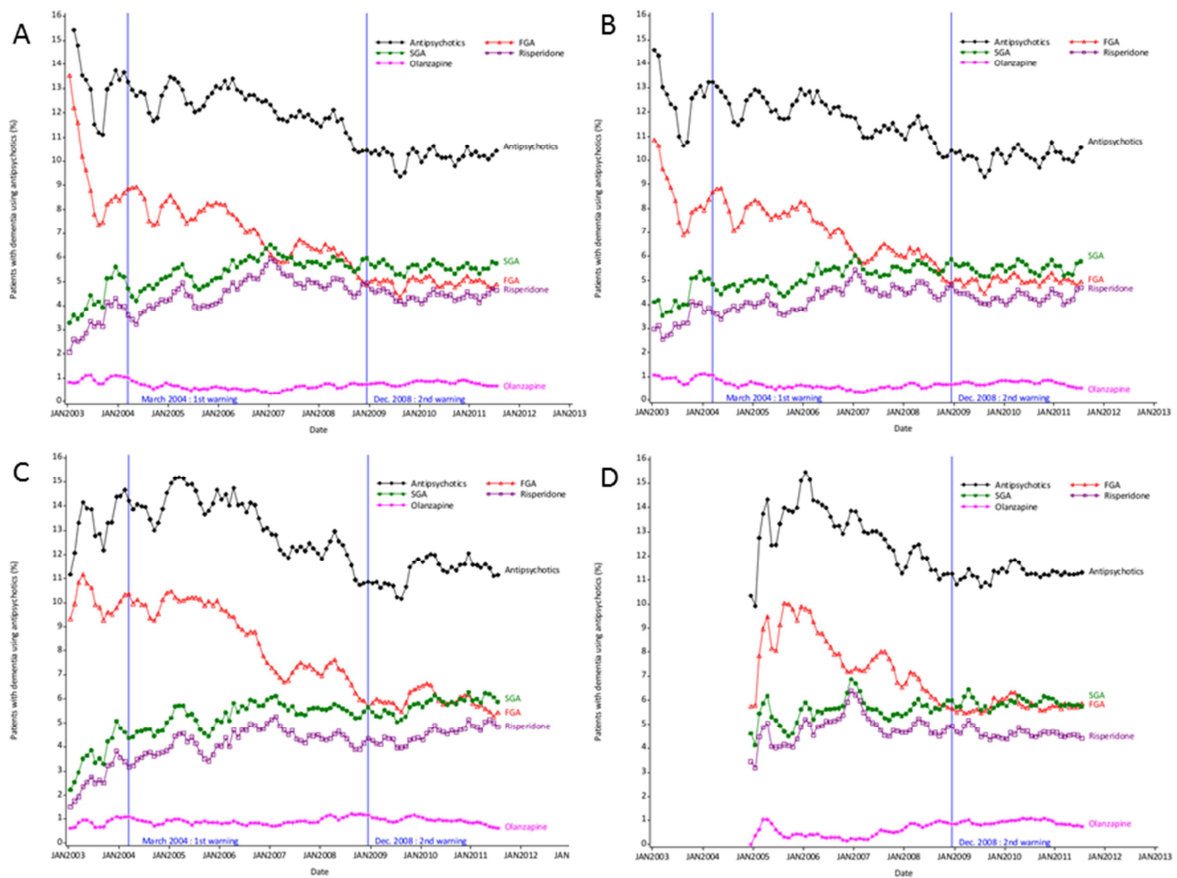

Graph A: patients with at least 2 dispensations of antidementia drugs over a 12-month period,

Graph B: patients with at least 2 dispensations of cholinesterase inhibitors (donepezil, galantamine, rivastigmine) over a 12-month period,

Graph C: patients with at least a registration with the chronic condition “Alzheimer’s disease and related disorders”,

Graph D: patients with at least one hospital diagnosis for dementia (ICD10 codes: F00, F01, F02, F03, G30).

Abbreviations: FGA: first generation antipsychotic, ICD: International classification of diseases, SGA: second generation antipsychotic.

**Supplementary Fig. 2** Trends in monthly prevalence of overall antipsychotic, FGA, SGA, risperidone and olanzapine use in patients with dementia according to criteria used to define dementia (3-month moving average series)

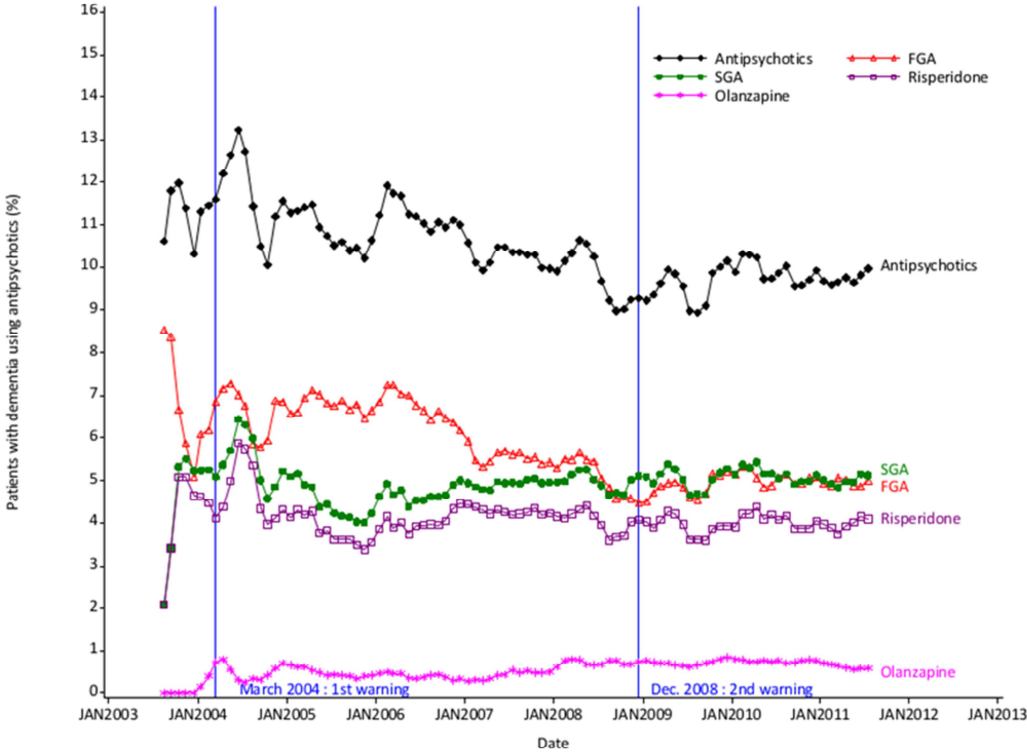

Abbreviations: FGA: first generation antipsychotic, SGA: second generation antipsychotic
